# Supplementary material
Source: PubMed Central journal article supplement (PMC4465866)
Supplement: NIHMS679163-supplement-Supplemental_Material.pdf [file NIHMS679163-supplement-Supplemental_Material.pdf]

**Supplemental Material**

**Smooth Muscle PPAR $\gamma$  Plays a Critical Role in Formation and Rupture of Cerebral Aneurysms in Mice In Vivo**

David M. Hasan, M.D., Robert M. Starke, M.D., He Gu, M.D., Ph.D., Katina Wilson, B.S., Yi Chu Ph.D., Nohra Chalouhi, M.D., Donald D. Heistad, M.D., Frank M. Faraci, Ph.D., Curt D. Sigmund, Ph.D.

Address Correspondence to:  
Curt D. Sigmund, Ph.D.  
Department of Pharmacology,  
University of Iowa, Iowa City, IA  
(319) 335-7946;  
Fax: (319) 335-8930;  
Email: [curt-sigmund@uiowa.edu](mailto:curt-sigmund@uiowa.edu)

## Supplemental Methods

**Genotyping:** Genotyping of the transgenes was performed by PCR of tail DNA using the following primers: *S-P467L* transgene: 5'-TATCTTCTAACTGGGTGGTGGTG-3' and 5'-GAGGAGAGTTACTTGGTCGTTCA-3'; *E-V290M* transgene: 5'CAGCTCACAAAGGAACAATAACAG-3' and 5-CTCCATAGTGAAATCCAGAAG-3'. Both models have been extensively backcrossed onto the C57BL/6J genetic background.

**Pharmacological Treatments:** Pioglitazone was suspended in water (20 mg/kg/day) whereas GW9662 (1 mg/kg/day) and MLN4924 (100 mg/kg/day) were dissolved in water. In C57BL/6 mice, drugs were administered intraperitoneally starting 24 hours post aneurysm induction surgery. A search of the literature suggested these are the most commonly used doses to achieve maximal desired effect.<sup>1-3</sup> Control mice (C57BL/6) were administered vehicle. Mice that died or were sacrificed due to deterioration based on neurological exam within 48 hours of aneurysm induction surgery were excluded from the study (see Supplemental Table S1). Neurological examinations were then carried out daily using a previously described method.<sup>4-7</sup> Mice were euthanized when they developed neurological signs (lethargy/decreased activity, circling in one direction, weakness or paralysis of one or more limbs, and/or hunched back), or experienced weight loss >20% of baseline.<sup>4-7</sup> All asymptomatic mice were euthanized 3 weeks after aneurysm induction surgery.

Ang-II was obtained from Bachem (Torrance, CA), pioglitazone was obtained from Takeda (Deerfield, IL), GW9662 was obtained from Santa Cruz Biotechnology (Dallas, TX), and MLN4924 was obtained from Cayman (Ann Arbor, MI). All other reagents were obtained from Sigma (St Louis, MO).

**Blood pressure analysis.** Systolic blood pressure was recorded in conscious restrained mice using the tail-cuff method (Visitech Systems BP-2000).<sup>4,8</sup> After training, blood pressures were measured before aneurysm induction surgery and weekly until day 21 of the study. Baseline systolic blood pressure (SBP) for all mice in different experiments was between 100-120 mmHg.

**Gene expression analysis.** After examination for aneurysms, cerebral arteries of the circle of Willis, including the basilar artery and middle cerebral arteries were harvested, rapidly frozen in liquid nitrogen, and stored at -80° Celsius. RNA was harvested in TRIzol and reversed transcribed as described previously.<sup>9</sup> PCR was performed using primer assays from Life Technologies (Table S2). Due to very small size of cerebral aneurysms in mice, we were unable to perform Western blotting to quantify relative level of specific proteins.

### Supplemental References

1. Collino M, Patel NS, Lawrence KM, Collin M, Latchman DS, Yaqoob MM, Thiemermann C. The selective PPARgamma antagonist GW9662 reverses the protection of LPS in a model of renal ischemia-reperfusion. *Kidney Int.*2005;68:529-536.
2. Gupta G, Krishna G, Chellappan DK, Gubbiyappa KS, Candasamy M, Dua K. Protective effect of pioglitazone, a PPARgamma agonist against acetaminophen-induced hepatotoxicity in rats. *Mol Cell Biochem.*2014;393:223-228.
3. Pelham CJ, Ketsawatsomkron P, Groh S, Grobe JL, de Lange WJ, Ibeawuchi SR, Keen HL, Weatherford ET, Faraci FM, Sigmund CD. Cullin-3 regulates vascular smooth muscle function and arterial blood pressure via PPAR $\gamma$  and RhoA/Rho-kinase. *Cell Metab.*2012;16:462-472.
4. Starke RM, Chalouhi N, Jabbour PM, Tjounakaris SI, Gonzalez LF, Rosenwasser RH, Wada K, Shimada K, Hasan DM, Greig NH, Owens GK, Dumont AS. Critical role of TNF-alpha in cerebral aneurysm formation and progression to rupture. *J Neuroinflammation.*2014;11:77.
5. Kanematsu Y, Kanematsu M, Kurihara C, Tada Y, Tsou TL, van RN, Lawton MT, Young WL, Liang EI, Nuki Y, Hashimoto T. Critical roles of macrophages in the formation of intracranial aneurysm. *Stroke.*2011;42:173-178.
6. Nuki Y, Tsou TL, Kurihara C, Kanematsu M, Kanematsu Y, Hashimoto T. Elastase-induced intracranial aneurysms in hypertensive mice. *Hypertension.*2009;54:1337-1344.
7. Makino H, Tada Y, Wada K, Liang EI, Chang M, Mobashery S, Kanematsu Y, Kurihara C, Palova E, Kanematsu M, Kitazato K, Hashimoto T. Pharmacological stabilization of intracranial aneurysms in mice: a feasibility study. *Stroke.*2012;43:2450-2456.
8. Ali MS, Starke RM, Jabbour PM, Tjounakaris SI, Gonzalez LF, Rosenwasser RH, Owens GK, Koch WJ, Greig NH, Dumont AS. TNF-alpha induces phenotypic modulation in cerebral vascular smooth muscle cells: implications for cerebral aneurysm pathology. *J Cereb Blood Flow Metab.*2013;33:1564-1573.
9. Chu Y, Heistad DD, Knudtson KL, Lamping KG, Faraci FM. Quantification of mRNA for endothelial nitric oxide synthase in mouse blood vessels by real-time polymerase chain reaction. *Arterioscler Thromb Vasc Biol.*2002;22:611-616.

**Table S1:** Mice excluded from cerebral aneurysm analysis.

|                               | <b>Control Group</b> |                  | <b>Experimental Group</b>                     |                  |
|-------------------------------|----------------------|------------------|-----------------------------------------------|------------------|
|                               | Total Excluded       | Aortic Aneurysms | Total Excluded                                | Aortic Aneurysms |
| Pioglitazone vs. control      | 5 ( <i>of 18</i> )   | 0                | 2 ( <i>of 17</i> )                            | 1                |
| GW9662 or MLN4924 vs. control | 6 ( <i>of 18</i> )   | 1                | GW 1 ( <i>of 9</i> )<br>MLN 0 ( <i>of 9</i> ) | 0                |
| E-V290M vs. non-transgenic    | 2 ( <i>of 15</i> )   | 1                | 3 ( <i>of 16</i> )                            | 0                |
| S-P467L vs. non-transgenic    | 1 ( <i>of 11</i> )   | 1                | 1 ( <i>of 17</i> )                            | 0                |

**Table S2: TaqMan Primers and Probes**

| Gene         | Catalog #             | Company                           |
|--------------|-----------------------|-----------------------------------|
| CD68         | Mm03047343_m1         | Applied Biosystems (ABI)          |
| Cxcl1        | Mm.PT.58.42076891     | Integrated DNA Technologies (IDT) |
| MCP-1        | Mm.PT.58.56a.42151692 | Integrated DNA Technologies (IDT) |
| TNF $\alpha$ | Mm.99999068_m1        | Applied Biosystems (ABI)          |
| MMP3         | Mm.00440295_m1        | Applied Biosystems (ABI)          |
| MMP13        | Mm.01168713_m1        | Applied Biosystems (ABI)          |
| MMP9         | Mm.PT.58.10100097     | Integrated DNA Technologies (IDT) |
| Cul3         | Mm. PT.58.1917739     | Integrated DNA Technologies (IDT) |
| Keap1        | Mm. PT.58.5093463     | Integrated DNA Technologies (IDT) |
| MMP3         | Mm.00477786_m1        | Applied Biosystems (ABI)          |

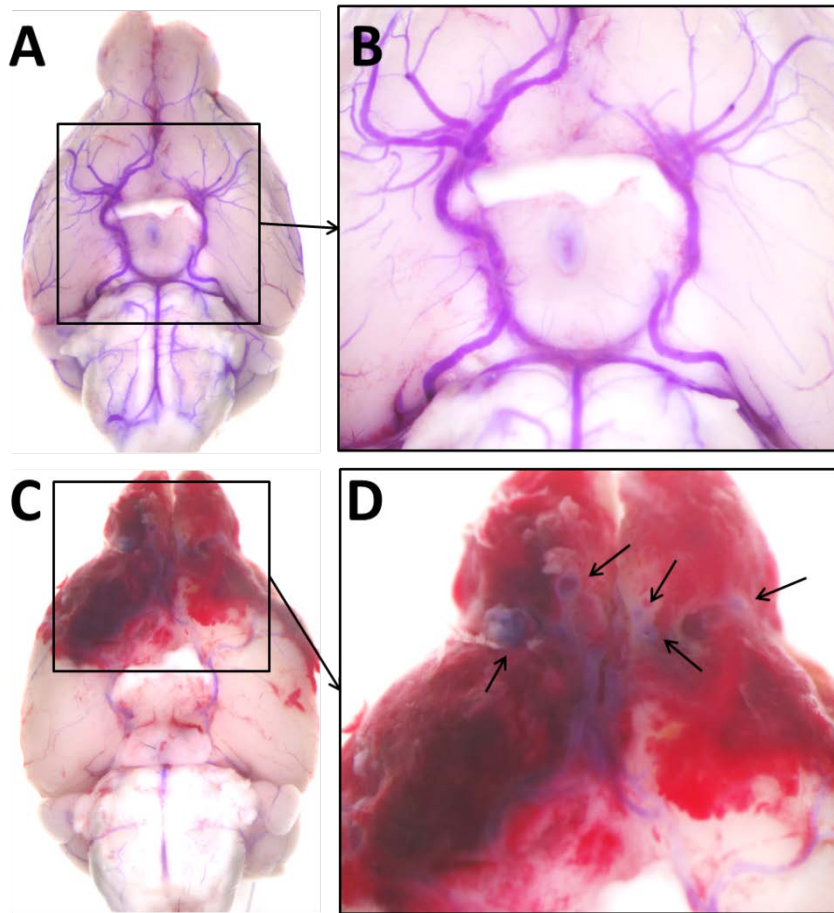

Figure S1: Illustration of cerebral aneurysms and SAH A) Cerebral arteries in a non-transgenic mouse. B) Higher magnification of the same cerebral arteries in A showing no aneurysms. C) Cerebral arteries in a S-P457L mouse with SAH and multiple intracranial aneurysms localized to anterior cerebral and olfactory arteries. D) Higher magnification of the same aneurysms with arrows indicating their location.

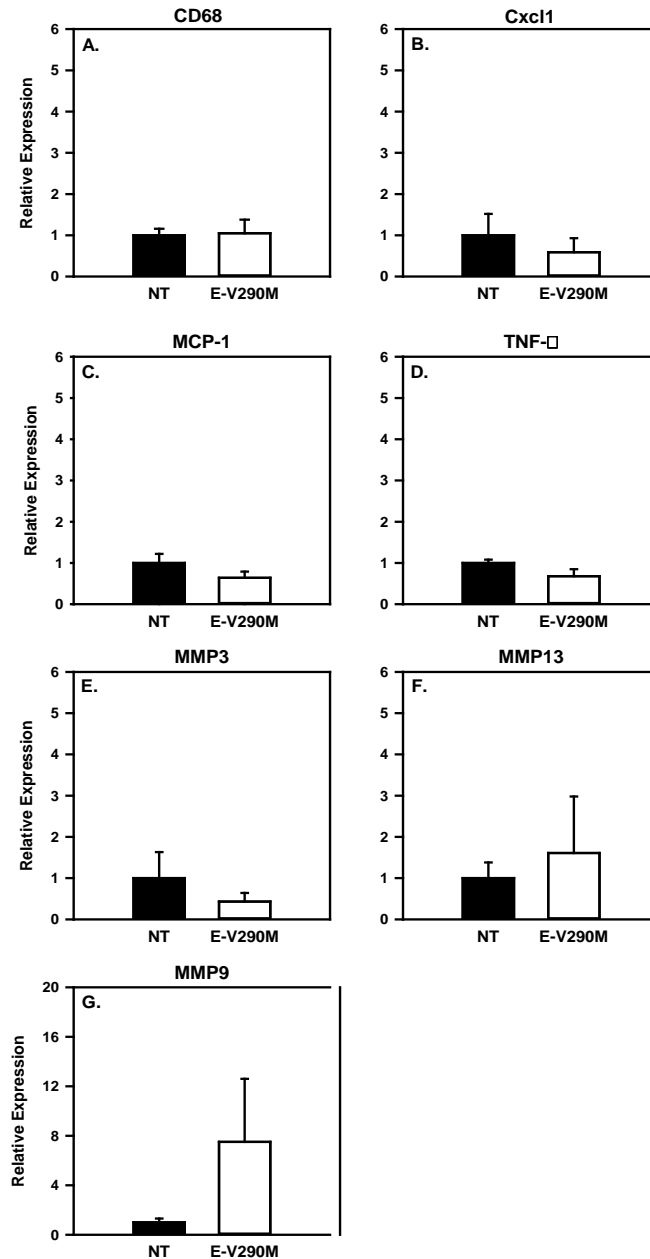

Figure S2: Gene expression of selected inflammatory markers: comparison of gene expression of CD68, Cxcl1, MCP-1, TBF- $\alpha$ , MMP 3, MMP 13, and MMP 9 in cerebral arteries in E-V290M versus their non-transgenic littermates. No statistical difference. E-V290M, n=6; NT, n=6.



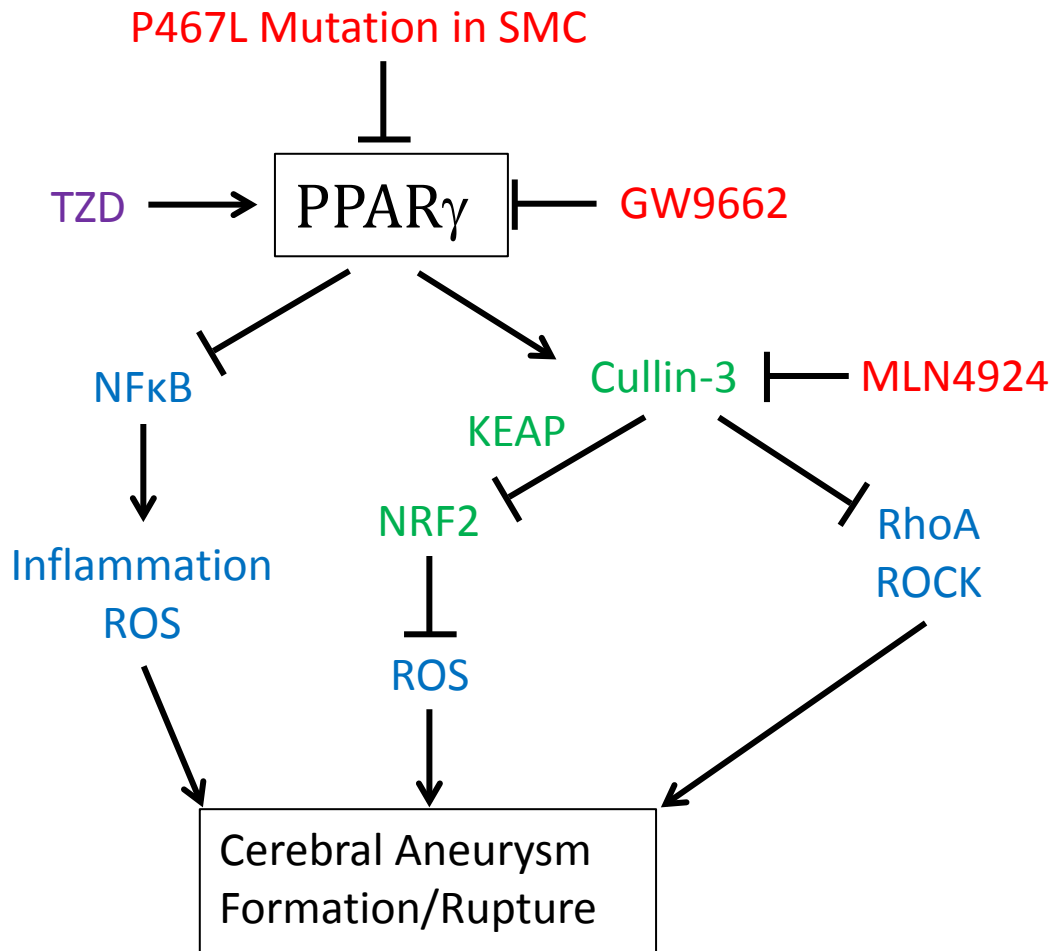

Increased Aneurysm Formation or Rupture

Decreased Aneurysm Formation or Rupture

Increased Expression or Activity

Decreased Expression or Activity

Figure S3: Schematic figure describing a potential molecular mechanism by which expression of SMC-PPAR $\gamma$  DN increases formation and rupture of cerebral aneurysms.
